# Supplementary material for: An Integrated Lipidomics and Phenotype Study Reveals Protective Effect and Biochemical Mechanism of Traditionally Used Alisma orientale Juzepzuk in Chronic Kidney Disease
Source: Front Pharmacol. 2018 Feb 8;9:53. doi: 10.3389/fphar.2018.00053 (PMC5809464; doi:10.3389/fphar.2018.00053)

## Supplementary Material

# An Integrated Lipidomics and Phenotype Study Reveals Protective Effect and Biochemical Mechanism of Traditionally Used *Alisma Orientale* Juzepzuk in Chronic Kidney Disease

Fang Dou<sup>1†</sup>, Hua Miao<sup>2‡</sup>, Jing-Wen Wang<sup>1</sup>, Lin Chen<sup>2</sup>, Ming Wang<sup>2</sup>, Hua Chen<sup>2</sup>, Ai-Dong Wen<sup>1\*</sup>, Ying-Yong Zhao<sup>2\*</sup>

<sup>1</sup> Department of Pharmacy, Xijing Hospital, Fourth Military Medical University, Xi'an, 710032, China

<sup>2</sup> Key Laboratory of Resource Biology and Biotechnology in Western China, Ministry of Education, Northwest University, No. 229 Taibai North Road, Xi'an, Shaanxi 710069, China

<sup>†</sup>Co-First authors.

**FIGURE S1 | Overview of arachidonic acid metabolism with MetPA (reference map by KEGG).** Green boxes represent enzymatic activities with putative cases of analogy in rats.

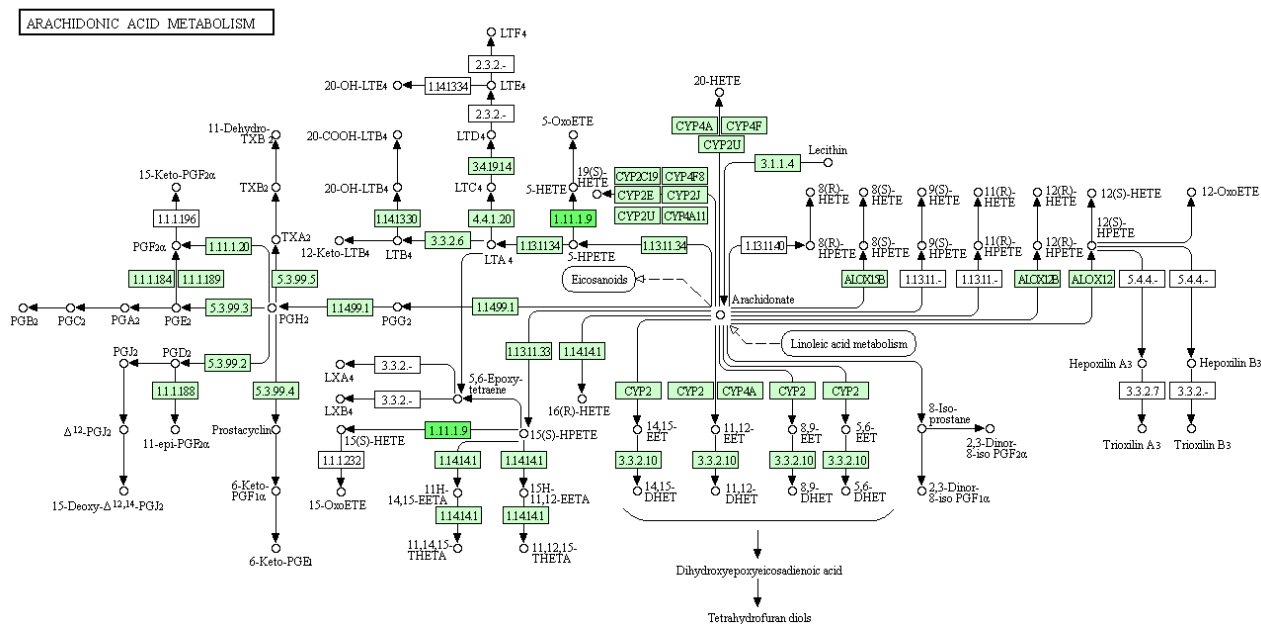

Supplement: Supplementary file 1 [file Image1.pdf]
